# Supplementary material
Source: PubMed Central journal article supplement (PMC5003780)
Supplement: NIHMS660347-supplement-supplement_1.pdf [file NIHMS660347-supplement-supplement_1.pdf]

## SUPPLEMENTAL MATERIAL

**Table S1.** Genes demonstrating core enrichment within the 13 gene ontology gene sets identified as statistically significant by Gene Set Enrichment Analysis in EAT versus SAT.

| Gene set                                    | Gene name                                                                                                                                                                                                                                                                                                                                                                                                                                                                                                                                                                                                                                                                                                                                                                                                                                                                                                                                                                                                                                                                                                                                                                                                                       | Gene Symbol                                                                                                                                                        |
|---------------------------------------------|---------------------------------------------------------------------------------------------------------------------------------------------------------------------------------------------------------------------------------------------------------------------------------------------------------------------------------------------------------------------------------------------------------------------------------------------------------------------------------------------------------------------------------------------------------------------------------------------------------------------------------------------------------------------------------------------------------------------------------------------------------------------------------------------------------------------------------------------------------------------------------------------------------------------------------------------------------------------------------------------------------------------------------------------------------------------------------------------------------------------------------------------------------------------------------------------------------------------------------|--------------------------------------------------------------------------------------------------------------------------------------------------------------------|
| GO:0007498<br>Mesoderm<br>development       | transcription factor 21<br>slit homolog 2 (Drosophila)<br>eyes absent homolog 2 (Drosophila)<br>secreted and transmembrane 1<br>BMX non-receptor tyrosine kinase<br>IKAROS family zinc finger 1 (Ikaros)<br>IKAROS family zinc finger 3 (Aiolos)<br>snail homolog 2 (Drosophila)<br>Bruton agammaglobulinemia tyrosine kinase<br>growth differentiation factor 11                                                                                                                                                                                                                                                                                                                                                                                                                                                                                                                                                                                                                                                                                                                                                                                                                                                               | TCF21<br>SLIT2<br>EYA2<br>SECTM1<br>BMX<br>IKZF1<br>IKZF3<br>SNAI2<br>BTK<br>GDF11                                                                                 |
| GO:0004620<br>Phospholipase<br>activity     | phospholipase A2, group V<br>phospholipase A2, group IIA (platelets, synovial fluid)<br>phospholipase D1, phosphatidylcholine-specific<br>coagulation factor II (thrombin) receptor-like 2<br>phospholipase C, beta 2<br>lipase, endothelial<br>chemokine (C-C motif) receptor 5<br>phospholipase C, eta 1<br>phospholipase A2, group IID<br>bradykinin receptor B2<br>complement component 3a receptor 1<br>phospholipase A2, group IVC (cytosolic, calcium-independent)                                                                                                                                                                                                                                                                                                                                                                                                                                                                                                                                                                                                                                                                                                                                                       | PLA2G5<br>PLA2G2A<br>PLD1<br>F2RL2<br>PLCB2<br>LIPG<br>CCR5<br>PLCH1<br>PLA2G2D<br>BDKRB2<br>C3AR1<br>PLA2G4C                                                      |
| GO:0005267<br>Potassium<br>channel activity | potassium intermediate/small conductance calcium-activated channel, subfamily N, member 3<br>potassium channel, subfamily K, member 17<br>potassium large conductance calcium-activated channel, subfamily M, beta member 4<br>potassium voltage-gated channel, shaker-related subfamily, member 3<br>potassium channel, subfamily K, member 5<br>potassium voltage-gated channel, Shal-related subfamily, member 3<br>potassium channel, subfamily K, member 1<br>potassium channel, subfamily K, member 6<br>potassium voltage-gated channel, KQT-like subfamily, member 1<br>potassium voltage-gated channel, KQT-like subfamily, member 5<br>potassium voltage-gated channel, shaker-related subfamily, member 5<br>potassium inwardly-rectifying channel, subfamily J, member 10<br>potassium channel, subfamily K, member 3<br>potassium voltage-gated channel, Isk-related family, member 1<br>potassium voltage-gated channel, shaker-related subfamily, member 1 (episodic ataxia with myokymia)<br>Kv channel interacting protein 2<br>potassium intermediate/small conductance calcium-activated channel, subfamily N, member 4<br>potassium large conductance calcium-activated channel, subfamily M, beta member 2 | KCNN3<br>KCNC17<br>KCNCB4<br>KCNA3<br>KCNC5<br>KCND3<br>KCNC1<br>KCNC6<br>KCNQ1<br>KCNQ5<br>KCNA5<br>KCNJ10<br>KCNC3<br>KCNE1<br>KCNA1<br>KCNP2<br>KCNN4<br>KCNCB2 |
| GO:0007599<br>Hemostasis                    | multimerin 1<br>tissue factor pathway inhibitor (lipoprotein-associated coagulation inhibitor)<br>integrin, alpha 2 (CD49B, alpha 2 subunit of VLA-2 receptor)<br>protein S (alpha)<br>plasminogen activator, tissue<br>ectonucleoside triphosphate diphosphohydrolase 1<br>coagulation factor II (thrombin) receptor-like 2<br>gamma-glutamyl carboxylase<br>coagulation factor VIII, procoagulant component (hemophilia A)<br>coagulation factor XIII, A1 polypeptide<br>CD40 ligand (TNF superfamily, member 5, hyper-IgM syndrome)<br>thrombomodulin<br>coagulation factor II (thrombin) receptor<br>Wiskott-Aldrich syndrome (eczema-thrombocytopenia)<br>complement component 4 binding protein, beta<br>Friend leukemia virus integration 1<br>serpin peptidase inhibitor, clade E (nexin, plasminogen activator inhibitor type 1), member 1                                                                                                                                                                                                                                                                                                                                                                             | MMRN1<br>TFPI<br>ITGA2<br>PROS1<br>PLAT<br>ENTPD1<br>F2RL2<br>GGCX<br>F8<br>F13A1<br>CD40LG<br>THBD<br>F2R<br>WAS<br>C4BPB<br>FLI1<br>SERPINE1                     |
| GO:0050817<br>Coagulation                   | multimerin 1<br>tissue factor pathway inhibitor (lipoprotein-associated coagulation inhibitor)<br>integrin, alpha 2 (CD49B, alpha 2 subunit of VLA-2 receptor)<br>protein S (alpha)<br>plasminogen activator, tissue<br>ectonucleoside triphosphate diphosphohydrolase 1                                                                                                                                                                                                                                                                                                                                                                                                                                                                                                                                                                                                                                                                                                                                                                                                                                                                                                                                                        | MMRN1<br>TFPI<br>ITGA2<br>PROS1<br>PLAT<br>ENTPD1                                                                                                                  |

|                                                                                 |                                                                                                                                                                                                                                                                                                                                                                                                                                                                                                                                                                                                                                                                                                                                                                                                                                                                                                                                                                 |                                                                                                                                                                                                    |
|---------------------------------------------------------------------------------|-----------------------------------------------------------------------------------------------------------------------------------------------------------------------------------------------------------------------------------------------------------------------------------------------------------------------------------------------------------------------------------------------------------------------------------------------------------------------------------------------------------------------------------------------------------------------------------------------------------------------------------------------------------------------------------------------------------------------------------------------------------------------------------------------------------------------------------------------------------------------------------------------------------------------------------------------------------------|----------------------------------------------------------------------------------------------------------------------------------------------------------------------------------------------------|
|                                                                                 | <p>coagulation factor II (thrombin) receptor-like 2<br/> gamma-glutamyl carboxylase<br/> coagulation factor VIII, procoagulant component (hemophilia A)<br/> coagulation factor XIII, A1 polypeptide<br/> CD40 ligand (TNF superfamily, member 5, hyper-IgM syndrome)<br/> thrombomodulin<br/> coagulation factor II (thrombin) receptor<br/> Wiskott-Aldrich syndrome (eczema-thrombocytopenia)<br/> complement component 4 binding protein, beta<br/> serpin peptidase inhibitor, clade E (nexin, plasminogen activator inhibitor type 1), member 1</p>                                                                                                                                                                                                                                                                                                                                                                                                       | <p>F2RL2<br/> GGCX<br/> F8<br/> F13A1<br/> CD40LG<br/> THBD<br/> F2R<br/> WAS<br/> C4BPB<br/> SERPINE1</p>                                                                                         |
| <p>GO:0007596<br/> Blood coagulation</p>                                        | <p>multimerin 1<br/> tissue factor pathway inhibitor (lipoprotein-associated coagulation inhibitor)<br/> integrin, alpha 2 (CD49B, alpha 2 subunit of VLA-2 receptor)<br/> protein S (alpha)<br/> plasminogen activator, tissue<br/> ectonucleoside triphosphate diphosphohydrolase 1<br/> coagulation factor II (thrombin) receptor-like 2<br/> gamma-glutamyl carboxylase<br/> coagulation factor VIII, procoagulant component (hemophilia A)<br/> coagulation factor XIII, A1 polypeptide<br/> CD40 ligand (TNF superfamily, member 5, hyper-IgM syndrome)<br/> thrombomodulin<br/> coagulation factor II (thrombin) receptor<br/> Wiskott-Aldrich syndrome (eczema-thrombocytopenia)<br/> complement component 4 binding protein, beta<br/> serpin peptidase inhibitor, clade E (nexin, plasminogen activator inhibitor type 1), member 1</p>                                                                                                               | <p>MMRN1<br/> TFPI<br/> ITGA2<br/> PROS1<br/> PLAT<br/> ENTPD1<br/> F2RL2<br/> GGCX<br/> F8<br/> F13A1<br/> CD40LG<br/> THBD<br/> F2R<br/> WAS<br/> C4BPB<br/> SERPINE1</p>                        |
| <p>GO:0003704<br/> Specific RNA polymerase II transcription factor activity</p> | <p>Meis1, myeloid ecotropic viral integration site 1 homolog 2 (mouse)<br/> GLIS family zinc finger 3<br/> prospero-related homeobox 1<br/> SRY (sex determining region Y)-box 9 (campomelic dysplasia, autosomal sex-reversal)<br/> nuclear receptor subfamily 2, group F, member 1<br/> nuclear receptor subfamily 2, group F, member 2</p>                                                                                                                                                                                                                                                                                                                                                                                                                                                                                                                                                                                                                   | <p>MEIS2<br/> GLIS3<br/> PROX1<br/> SOX9<br/> NR2F1<br/> NR2F2</p>                                                                                                                                 |
| <p>GO:0050878<br/> Regulation of body fluid levels</p>                          | <p>multimerin 1<br/> tissue factor pathway inhibitor (lipoprotein-associated coagulation inhibitor)<br/> integrin, alpha 2 (CD49B, alpha 2 subunit of VLA-2 receptor)<br/> protein S (alpha)<br/> plasminogen activator, tissue<br/> ectonucleoside triphosphate diphosphohydrolase 1<br/> coagulation factor II (thrombin) receptor-like 2<br/> gamma-glutamyl carboxylase<br/> coagulation factor VIII, procoagulant component (hemophilia A)<br/> coagulation factor XIII, A1 polypeptide<br/> CD40 ligand (TNF superfamily, member 5, hyper-IgM syndrome)<br/> thrombomodulin<br/> coagulation factor II (thrombin) receptor<br/> Wiskott-Aldrich syndrome (eczema-thrombocytopenia)<br/> solute carrier family 22 (organic cation transporter), member 4<br/> complement component 4 binding protein, beta<br/> Friend leukemia virus integration 1<br/> serpin peptidase inhibitor, clade E (nexin, plasminogen activator inhibitor type 1), member 1</p> | <p>MMRN1<br/> TFPI<br/> ITGA2<br/> PROS1<br/> PLAT<br/> ENTPD1<br/> F2RL2<br/> GGCX<br/> F8<br/> F13A1<br/> CD40LG<br/> THBD<br/> F2R<br/> WAS<br/> SLC22A4<br/> C4BPB<br/> FLI1<br/> SERPINE1</p> |
| <p>GO:0042060<br/> Wound healing</p>                                            | <p>multimerin 1<br/> tissue factor pathway inhibitor (lipoprotein-associated coagulation inhibitor)<br/> integrin, alpha 2 (CD49B, alpha 2 subunit of VLA-2 receptor)<br/> protein S (alpha)<br/> plasminogen activator, tissue<br/> ectonucleoside triphosphate diphosphohydrolase 1<br/> coagulation factor II (thrombin) receptor-like 2<br/> gamma-glutamyl carboxylase<br/> coagulation factor VIII, procoagulant component (hemophilia A)<br/> coagulation factor XIII, A1 polypeptide<br/> CD40 ligand (TNF superfamily, member 5, hyper-IgM syndrome)<br/> thrombomodulin<br/> coagulation factor II (thrombin) receptor<br/> Wiskott-Aldrich syndrome (eczema-thrombocytopenia)<br/> transforming growth factor, beta 2<br/> complement component 4 binding protein, beta<br/> melanoma inhibitory activity family, member 3<br/> serpin peptidase inhibitor, clade E (nexin, plasminogen activator inhibitor type 1), member 1</p>                    | <p>MMRN1<br/> TFPI<br/> ITGA2<br/> PROS1<br/> PLAT<br/> ENTPD1<br/> F2RL2<br/> GGCX<br/> F8<br/> F13A1<br/> CD40LG<br/> THBD<br/> F2R<br/> WAS<br/> TGFB2<br/> C4BPB<br/> MIA3<br/> SERPINE1</p>   |
| <p>GO:0016860<br/> Intramolecular</p>                                           | <p>prostaglandin D2 synthase 21kDa (brain)<br/> protein disulfide isomerase family A, member 5</p>                                                                                                                                                                                                                                                                                                                                                                                                                                                                                                                                                                                                                                                                                                                                                                                                                                                              | <p>PTGDS<br/> PDIA5</p>                                                                                                                                                                            |

|                                                               |                                                                                                                                                                                                                                                                                                                                                                                                                                                                                                                                                                                                                                                                                                                                                                                                                                                                                                                                                                                                                                                                                                                                                                                                                                                                                                                                                                                                                                                                                                                                                                                                                                                                                                                                                                                                                                                                                                                                                                                                                                   |                                                                                                                                                                                                                                                                                                                                                                                                                                            |
|---------------------------------------------------------------|-----------------------------------------------------------------------------------------------------------------------------------------------------------------------------------------------------------------------------------------------------------------------------------------------------------------------------------------------------------------------------------------------------------------------------------------------------------------------------------------------------------------------------------------------------------------------------------------------------------------------------------------------------------------------------------------------------------------------------------------------------------------------------------------------------------------------------------------------------------------------------------------------------------------------------------------------------------------------------------------------------------------------------------------------------------------------------------------------------------------------------------------------------------------------------------------------------------------------------------------------------------------------------------------------------------------------------------------------------------------------------------------------------------------------------------------------------------------------------------------------------------------------------------------------------------------------------------------------------------------------------------------------------------------------------------------------------------------------------------------------------------------------------------------------------------------------------------------------------------------------------------------------------------------------------------------------------------------------------------------------------------------------------------|--------------------------------------------------------------------------------------------------------------------------------------------------------------------------------------------------------------------------------------------------------------------------------------------------------------------------------------------------------------------------------------------------------------------------------------------|
| oxidoreductase activity                                       | <p>prostaglandin I2 (prostacyclin) synthase<br/> glucosamine-6-phosphate deaminase 1<br/> hydroxy-delta-5-steroid dehydrogenase, 3 beta- and steroid delta-isomerase 1<br/> endoplasmic reticulum protein 29<br/> emopamil binding protein (sterol isomerase)<br/> protein disulfide isomerase family A, member 6<br/> dopachrome tautomerase (dopachrome delta-isomerase, tyrosine-related protein 2)<br/> protein disulfide isomerase family A, member 3</p>                                                                                                                                                                                                                                                                                                                                                                                                                                                                                                                                                                                                                                                                                                                                                                                                                                                                                                                                                                                                                                                                                                                                                                                                                                                                                                                                                                                                                                                                                                                                                                    | <p>PTGIS<br/> GNPDA1<br/> HSD3B1<br/> ERP29<br/> EBP<br/> PDIA6<br/> DCT<br/> PDIA3</p>                                                                                                                                                                                                                                                                                                                                                    |
| GO:0008624<br>Induction of apoptosis by extracellular signals | <p>death-associated protein kinase 1<br/> CD38 molecule<br/> protein kinase C, alpha<br/> death-associated protein<br/> Bruton agammaglobulinemia tyrosine kinase<br/> BCL2-associated X protein<br/> adenosine A1 receptor<br/> tumor necrosis factor receptor superfamily, member 25</p>                                                                                                                                                                                                                                                                                                                                                                                                                                                                                                                                                                                                                                                                                                                                                                                                                                                                                                                                                                                                                                                                                                                                                                                                                                                                                                                                                                                                                                                                                                                                                                                                                                                                                                                                        | <p>DAPK1<br/> CD38<br/> PRKCA<br/> DAP<br/> BTK<br/> BAX<br/> ADORA1<br/> TNFRSF25</p>                                                                                                                                                                                                                                                                                                                                                     |
| GO:0016337<br>Cell cell adhesion                              | <p>Myelin protein zero-like 2<br/> claudin 1<br/> matrix Gla protein<br/> neural cell adhesion molecule 2<br/> LIM domain only 4<br/> cytoplasmic FMR1 interacting protein 2<br/> claudin 15<br/> annexin A9<br/> poliovirus receptor-related 2 (herpesvirus entry mediator B)<br/> CD209 molecule<br/> spleen tyrosine kinase<br/> contactin 4<br/> integrin, beta 2 (complement component 3 receptor 3 and 4 subunit)<br/> cadherin, EGF LAG seven-pass G-type receptor 1 (flamingo homolog, Drosophila)<br/> signal-regulatory protein gamma</p>                                                                                                                                                                                                                                                                                                                                                                                                                                                                                                                                                                                                                                                                                                                                                                                                                                                                                                                                                                                                                                                                                                                                                                                                                                                                                                                                                                                                                                                                               | <p>MPZL2<br/> CLDN1<br/> MGP<br/> NCAM2<br/> LMO4<br/> CYFIP2<br/> CLDN15<br/> ANXA9<br/> PVRL2<br/> CD209<br/> SYK<br/> CNTN4<br/> ITGB2<br/> CELSR1<br/> SIRPG</p>                                                                                                                                                                                                                                                                       |
| GO:0007267<br>Cell cell signaling                             | <p>potassium intermediate/small conductance calcium-activated channel, subfamily N, member 3<br/> collagen, type IV, alpha 4<br/> chemokine (C-C motif) ligand 21<br/> mal, T-cell differentiation protein<br/> phosphodiesterase 7B<br/> wingless-type MMTV integration site family, member 5A<br/> interleukin 7<br/> synaptosomal-associated protein, 25kDa<br/> vasoactive intestinal peptide receptor 2<br/> stabilin 1<br/> Kv channel interacting protein 1<br/> chemokine (C-C motif) ligand 26<br/> synuclein, alpha interacting protein (synphilin)<br/> interleukin 18 (interferon-gamma-inducing factor)<br/> transforming growth factor, beta 3<br/> fibroblast growth factor 9 (glia-activating factor)<br/> WNT1 inducible signaling pathway protein 1<br/> potassium large conductance calcium-activated channel, subfamily M, beta member 4<br/> quinolinate phosphoribosyltransferase (nicotinate-nucleotide pyrophosphorylase (carboxylating))<br/> complement component 1, q subcomponent, A chain<br/> chemokine (C-X-C motif) ligand 13 (B-cell chemoattractant)<br/> proprotein convertase subtilisin/kexin type 6<br/> discs, large homolog 4 (Drosophila)<br/> sema domain, seven thrombospondin repeats (type 1 and type 1-like), transmembrane domain (TM) and short cytoplasmic domain, (semaphorin) 5A<br/> platelet-derived growth factor alpha polypeptide<br/> tumor necrosis factor receptor superfamily, member 11a, NFKB activator<br/> stanniocalcin 1<br/> fibroblast growth factor 18<br/> synaptotagmin I<br/> prostaglandin I2 (prostacyclin) receptor (IP)<br/> chemokine (C-X-C motif) ligand 6 (granulocyte chemotactic protein 2)<br/> sema domain, immunoglobulin domain (Ig), short basic domain, secreted, (semaphorin) 3B<br/> chemokine (C-C motif) ligand 13<br/> double C2-like domains, alpha<br/> regulating synaptic membrane exocytosis 1<br/> proprotein convertase subtilisin/kexin type 2<br/> protocadherin beta 5<br/> glutamyl aminopeptidase (aminopeptidase A)</p> | <p>KCNN3<br/> COL4A4<br/> CCL21<br/> MAL<br/> PDE7B<br/> WNT5A<br/> IL7<br/> SNAP25<br/> VIPR2<br/> STAB1<br/> KCNIP1<br/> CCL26<br/> SNCAIP<br/> IL18<br/> TGFB3<br/> FGF9<br/> WISP1<br/> KCNMB4<br/> QPRT<br/> C1QA<br/> CXCL13<br/> PCSK6<br/> DLG4<br/> SEMA5A<br/><br/> PDGFA<br/> TNFRSF11A<br/> STC1<br/> FGF18<br/> SYT1<br/> PTGIR<br/> CXCL6<br/> SEMA3B<br/> CCL13<br/> DOC2A<br/> RIMS1<br/> PCSK2<br/> PCDHB5<br/> ENPEP</p> |

|  |                                                                                                                                                                                                                                                                                                                                                                                                                                                                                                                                                                                                                                                                                                                                                                                                                                                                                                                                                                                                                                                                                                                                                                                                                                                                                                                                                                                                                                                                                                                                                                                                                                                                                                                                                                                                                                                                                                                                                                                                                                                                                                                                                                                                                                                                                                                                                                                                                                                                                 |                                                                                                                                                                                                                                                                                                                                                                                                                                                                                                                                                                                                                               |
|--|---------------------------------------------------------------------------------------------------------------------------------------------------------------------------------------------------------------------------------------------------------------------------------------------------------------------------------------------------------------------------------------------------------------------------------------------------------------------------------------------------------------------------------------------------------------------------------------------------------------------------------------------------------------------------------------------------------------------------------------------------------------------------------------------------------------------------------------------------------------------------------------------------------------------------------------------------------------------------------------------------------------------------------------------------------------------------------------------------------------------------------------------------------------------------------------------------------------------------------------------------------------------------------------------------------------------------------------------------------------------------------------------------------------------------------------------------------------------------------------------------------------------------------------------------------------------------------------------------------------------------------------------------------------------------------------------------------------------------------------------------------------------------------------------------------------------------------------------------------------------------------------------------------------------------------------------------------------------------------------------------------------------------------------------------------------------------------------------------------------------------------------------------------------------------------------------------------------------------------------------------------------------------------------------------------------------------------------------------------------------------------------------------------------------------------------------------------------------------------|-------------------------------------------------------------------------------------------------------------------------------------------------------------------------------------------------------------------------------------------------------------------------------------------------------------------------------------------------------------------------------------------------------------------------------------------------------------------------------------------------------------------------------------------------------------------------------------------------------------------------------|
|  | <p>synapsin I<br/> ephrin-A5<br/> fibroblast growth factor 11<br/> homer homolog 1 (Drosophila)<br/> tumor necrosis factor (ligand) superfamily, member 8<br/> chemokine (C-C motif) receptor 1<br/> leukemia inhibitory factor (cholinergic differentiation factor)<br/> contactin 4<br/> chemokine (C-C motif) receptor 5<br/> inhibin, beta A (activin A, activin AB alpha polypeptide)<br/> GRB2-related adaptor protein<br/> snail homolog 2 (Drosophila)<br/> signal-regulatory protein gamma<br/> zyxin<br/> tumor necrosis factor, alpha-induced protein 6<br/> gap junction protein, alpha 1, 43kDa (connexin 43)<br/> ephrin-B3<br/> neuromedin B<br/> cholinergic receptor, nicotinic, alpha 4<br/> gamma-aminobutyric acid (GABA) A receptor, beta 2<br/> glutamate receptor, ionotropic, AMPA 2<br/> protein tyrosine phosphatase, receptor type, J<br/> transforming growth factor, beta 2<br/> proprotein convertase subtilisin/kexin type 5<br/> glutamate receptor, ionotropic, N-methyl D-aspartate 2A<br/> transcription factor AP-2 gamma (activating enhancer binding protein 2 gamma)<br/> c-mer proto-oncogene tyrosine kinase<br/> SH2 domain protein 1A, Duncan's disease (lymphoproliferative syndrome)<br/> myelin basic protein<br/> secretogranin V (7B2 protein)<br/> interleukin 1, beta<br/> myelin protein zero-like 1<br/> potassium voltage-gated channel, KQT-like subfamily, member 5<br/> gap junction protein, beta 2, 26kDa (connexin 26)<br/> chemokine (C motif) ligand 1<br/> CD33 molecule<br/> interleukin 15<br/> G protein-coupled receptor 176<br/> 5-hydroxytryptamine (serotonin) receptor 2A<br/> adenosine A1 receptor<br/> stanniocalcin 2<br/> chemokine (C-C motif) ligand 18 (pulmonary and activation-regulated)<br/> nicotinamide phosphoribosyltransferase<br/> gamma-aminobutyric acid (GABA) receptor, rho 2<br/> glutamate receptor, ionotropic, kainate 1<br/> potassium channel, subfamily K, member 3<br/> insulin-like 3 (Leydig cell)<br/> fibroblast growth factor 3 (murine mammary tumor virus integration site (v-int-2) oncogene homolog)<br/> amphiregulin (schwannoma-derived growth factor)<br/> Fas ligand (TNF superfamily, member 6)<br/> adrenergic, alpha-2B-, receptor<br/> angiotensinogen (serpin peptidase inhibitor, clade A, member 8)<br/> oncostatin M<br/> chemokine (C-C motif) ligand 4<br/> hypoxanthine phosphoribosyltransferase 1 (Lesch-Nyhan syndrome)<br/> tetraspanin 32</p> | <p>SYN1<br/> EFNA5<br/> FGF11<br/> HOMER1<br/> TNFSF8<br/> CCR1<br/> LIF<br/> CNTN4<br/> CCR5<br/> INHBA<br/> GRAP<br/> SNAI2<br/> SIRPG<br/> ZYX<br/> TNFAIP6<br/> GJA1<br/> EFNB3<br/> NMB<br/> CHRNA4<br/> GABRB2<br/> GRIA2<br/> PTPRJ<br/> TGFB2<br/> PCSK5<br/> GRIN2A<br/> TFAP2C<br/> MERTK<br/> SH2D1A<br/> MBP<br/> SCG5<br/> IL1B<br/> MPZL1<br/> KCNQ5<br/> GJB2<br/> XCL1<br/> CD33<br/> IL15<br/> GPR176<br/> HTR2A<br/> ADORA1<br/> STC2<br/> CCL18<br/> NAMPT<br/> GABRR2<br/> GRIK1<br/> KCNK3<br/> INSL3<br/> FGF3<br/> AREG<br/> FASLG<br/> ADRA2B<br/> AGT<br/> OSM<br/> CCL4<br/> HPRT1<br/> TSPAN32</p> |
|--|---------------------------------------------------------------------------------------------------------------------------------------------------------------------------------------------------------------------------------------------------------------------------------------------------------------------------------------------------------------------------------------------------------------------------------------------------------------------------------------------------------------------------------------------------------------------------------------------------------------------------------------------------------------------------------------------------------------------------------------------------------------------------------------------------------------------------------------------------------------------------------------------------------------------------------------------------------------------------------------------------------------------------------------------------------------------------------------------------------------------------------------------------------------------------------------------------------------------------------------------------------------------------------------------------------------------------------------------------------------------------------------------------------------------------------------------------------------------------------------------------------------------------------------------------------------------------------------------------------------------------------------------------------------------------------------------------------------------------------------------------------------------------------------------------------------------------------------------------------------------------------------------------------------------------------------------------------------------------------------------------------------------------------------------------------------------------------------------------------------------------------------------------------------------------------------------------------------------------------------------------------------------------------------------------------------------------------------------------------------------------------------------------------------------------------------------------------------------------------|-------------------------------------------------------------------------------------------------------------------------------------------------------------------------------------------------------------------------------------------------------------------------------------------------------------------------------------------------------------------------------------------------------------------------------------------------------------------------------------------------------------------------------------------------------------------------------------------------------------------------------|

**Table S2.** Genes demonstrating core enrichment within the 14 gene ontology gene sets identified as statistically significant by Gene Set Enrichment Analysis in SAT versus EAT.

| Gene set                                            | Gene name                                                                                                                                                                                                                                                                                                                                                                                                                   | Symbol                                                                                             |
|-----------------------------------------------------|-----------------------------------------------------------------------------------------------------------------------------------------------------------------------------------------------------------------------------------------------------------------------------------------------------------------------------------------------------------------------------------------------------------------------------|----------------------------------------------------------------------------------------------------|
| GO:0044257<br>Cellular protein<br>catabolic process | <p>sequestosome 1<br/> proteasome (prosome, macropain) 26S subunit, ATPase, 5<br/> valosin-containing protein<br/> ariadne homolog, ubiquitin-conjugating enzyme E2 binding protein, 1 (Drosophila)<br/> autocrine motility factor receptor<br/> ubiquitin-conjugating enzyme E2G 1 (UBC7 homolog, yeast)<br/> ubiquitin B<br/> ubiquitination factor E4A (UFD2 homolog, yeast)<br/> ubiquitin-conjugating enzyme E2L 3</p> | <p>SQSTM1<br/> PSMC5<br/> VCP<br/> ARIH1<br/> AMFR<br/> UBE2G1<br/> UBB<br/> UBE4A<br/> UBE2L3</p> |

|                                                                                   |                                                                                                                                                                                                                                                                                                                                                                                                                                                                                                                                                                                                                                                                                                                                                                                                                                                                                                                                                                                                                                                                                                                                                                                                                                                                                                                                                                                                                                                                                                                                                                                                                                                                                                    |                                                                                                                                                                                                                                                                                                                                                                                                                   |
|-----------------------------------------------------------------------------------|----------------------------------------------------------------------------------------------------------------------------------------------------------------------------------------------------------------------------------------------------------------------------------------------------------------------------------------------------------------------------------------------------------------------------------------------------------------------------------------------------------------------------------------------------------------------------------------------------------------------------------------------------------------------------------------------------------------------------------------------------------------------------------------------------------------------------------------------------------------------------------------------------------------------------------------------------------------------------------------------------------------------------------------------------------------------------------------------------------------------------------------------------------------------------------------------------------------------------------------------------------------------------------------------------------------------------------------------------------------------------------------------------------------------------------------------------------------------------------------------------------------------------------------------------------------------------------------------------------------------------------------------------------------------------------------------------|-------------------------------------------------------------------------------------------------------------------------------------------------------------------------------------------------------------------------------------------------------------------------------------------------------------------------------------------------------------------------------------------------------------------|
|                                                                                   | <p>ubiquitin fusion degradation 1 like (yeast)<br/> seven in absentia homolog 2 (Drosophila)<br/> carboxypeptidase A2 (pancreatic)<br/> ubiquitin-conjugating enzyme E2A (RAD6 homolog)<br/> ubiquitin protein ligase E3 component n-recogin 5<br/> F-box and leucine-rich repeat protein 4<br/> ubiquitin-conjugating enzyme E2K<br/> ring finger protein 11<br/> ring finger protein 144B<br/> tumor susceptibility gene 101<br/> ring finger protein 217<br/> STIP1 homology and U-box containing protein 1<br/> ubiquitin-conjugating enzyme E2B (RAD6 homolog)<br/> SMAD specific E3 ubiquitin protein ligase 1<br/> Parkinson disease (autosomal recessive, juvenile) 2, parkin<br/> F-box protein 7<br/> proteasome (prosome, macropain) 26S subunit, non-ATPase, 14<br/> ubiquitin-conjugating enzyme E2H (UBC8 homolog, yeast)<br/> nuclear protein localization 4 homolog (S. cerevisiae)<br/> ubiquitin protein ligase E3 component n-recogin 3 (putative)<br/> CDC23 (cell division cycle 23, yeast, homolog)<br/> Der1-like domain family, member 1<br/> ubiquitination factor E4B (UFD2 homolog, yeast)<br/> KIAA0368<br/> ubiquitin specific peptidase 33</p>                                                                                                                                                                                                                                                                                                                                                                                                                                                                                                                       | <p>UFD1L<br/> SIAH2<br/> CPA2<br/> UBE2A<br/> UBR5<br/> FBXL4<br/> UBE2K<br/> RNF11<br/> RNF144B<br/> TSG101<br/> STUB1<br/> RNF217<br/> UBE2B<br/> SMURF1<br/> PARK2<br/> FBXO7<br/> PSMD14<br/> UBE2H<br/> NPLOC4<br/> UBR3<br/> CDC23<br/> DERL1<br/> UBE4B<br/> KIAA0368<br/> USP33</p>                                                                                                                       |
| <p>GO:0030163<br/> Protein catabolic process</p>                                  | <p>sequestosome 1<br/> proteasome (prosome, macropain) 26S subunit, ATPase, 5<br/> valosin-containing protein<br/> ariadne homolog, ubiquitin-conjugating enzyme E2 binding protein, 1 (Drosophila)<br/> autocrine motility factor receptor<br/> unconventional SNARE in the ER 1 homolog<br/> ubiquitin-conjugating enzyme E2G 1 (UBC7 homolog, yeast)<br/> ubiquitin B<br/> ubiquitination factor E4A (UFD2 homolog, yeast)<br/> ubiquitin-conjugating enzyme E2L 3<br/> ubiquitin fusion degradation 1 like (yeast)<br/> seven in absentia homolog 2 (Drosophila)<br/> carboxypeptidase A2 (pancreatic)<br/> ubiquitin-conjugating enzyme E2A (RAD6 homolog)<br/> ubiquitin protein ligase E3 component n-recogin 5<br/> F-box and leucine-rich repeat protein 4<br/> ubiquitin-conjugating enzyme E2K<br/> ring finger protein 11<br/> ring finger protein 144B<br/> tumor susceptibility gene 101<br/> STIP1 homology and U-box containing protein 1<br/> ring finger protein 217<br/> ubiquitin-conjugating enzyme E2B (RAD6 homolog)<br/> SMAD specific E3 ubiquitin protein ligase 1<br/> Parkinson disease (autosomal recessive, juvenile) 2, parkin<br/> F-box protein 7<br/> proteasome (prosome, macropain) 26S subunit, non-ATPase, 14<br/> ubiquitin-conjugating enzyme E2H (UBC8 homolog, yeast)<br/> nuclear protein localization 4 homolog (S. cerevisiae)<br/> ubiquitin protein ligase E3 component n-recogin 3 (putative)<br/> CDC23 (cell division cycle 23, yeast, homolog)<br/> Der1-like domain family, member 1<br/> ubiquitination factor E4B (UFD2 homolog, yeast)<br/> KIAA0368<br/> ubiquitin specific peptidase 33<br/> seven in absentia homolog 1 (Drosophila)</p> | <p>SQSTM1<br/> PSMC5<br/> VCP<br/> ARIH1<br/> AMFR<br/> USE1<br/> UBE2G1<br/> UBB<br/> UBE4A<br/> UBE2L3<br/> UFD1L<br/> SIAH2<br/> CPA2<br/> UBE2A<br/> UBR5<br/> FBXL4<br/> UBE2K<br/> RNF11<br/> RNF144B<br/> TSG101<br/> STUB1<br/> RNF217<br/> UBE2B<br/> SMURF1<br/> PARK2<br/> FBXO7<br/> PSMD14<br/> UBE2H<br/> NPLOC4<br/> UBR3<br/> CDC23<br/> DERL1<br/> UBE4B<br/> KIAA0368<br/> USP33<br/> SIAH1</p> |
| <p>GO:0007179<br/> Transforming growth factor beta receptor signaling pathway</p> | <p>cell death-inducing DFFA-like effector a<br/> left-right determination factor 2<br/> STIP1 homology and U-box containing protein 1<br/> activin A receptor type II-like 1<br/> growth differentiation factor 15<br/> transforming growth factor, beta receptor III (betaglycan, 300kDa)<br/> zinc finger, FYVE domain containing 9<br/> SMAD, mothers against DPP homolog 2 (Drosophila)<br/> fibromodulin</p>                                                                                                                                                                                                                                                                                                                                                                                                                                                                                                                                                                                                                                                                                                                                                                                                                                                                                                                                                                                                                                                                                                                                                                                                                                                                                  | <p>CIDEA<br/> LEFTY2<br/> STUB1<br/> ACVRL1<br/> GDF15<br/> TGFB3<br/> ZFYE9<br/> SMAD2<br/> FMOD</p>                                                                                                                                                                                                                                                                                                             |

|                                                               |                                                                                                                                                                                                                                                                                                                                                                                                                                                                                                                                                                                                                                                                                                                                                                                                                                                                                                                                                                                                                                                                               |                                                                                                                                                                                                                      |
|---------------------------------------------------------------|-------------------------------------------------------------------------------------------------------------------------------------------------------------------------------------------------------------------------------------------------------------------------------------------------------------------------------------------------------------------------------------------------------------------------------------------------------------------------------------------------------------------------------------------------------------------------------------------------------------------------------------------------------------------------------------------------------------------------------------------------------------------------------------------------------------------------------------------------------------------------------------------------------------------------------------------------------------------------------------------------------------------------------------------------------------------------------|----------------------------------------------------------------------------------------------------------------------------------------------------------------------------------------------------------------------|
|                                                               | hydroxyprostaglandin dehydrogenase 15-(NAD)<br>SMAD, mothers against DPP homolog 7 (Drosophila)<br>activin A receptor, type 1<br>Cbp/p300-interacting transactivator, with Glu/Asp-rich carboxy-terminal domain, 2<br>growth differentiation factor 10<br>cyclin-dependent kinase inhibitor 2B (p15, inhibits CDK4)                                                                                                                                                                                                                                                                                                                                                                                                                                                                                                                                                                                                                                                                                                                                                           | HPGD<br>SMAD7<br>ACVR1<br>CITED2<br>GDF10<br>CDKN2B                                                                                                                                                                  |
| GO:0048037<br>Cofactor binding                                | amine oxidase, copper containing 3 (vascular adhesion protein 1)<br>malic enzyme 3, NADP(+)-dependent, mitochondrial<br>aldehyde dehydrogenase 6 family, member A1<br>NADPH oxidase 4<br>hydroxyprostaglandin dehydrogenase 15-(NAD)<br>nicotinamide nucleotide transhydrogenase<br>apoptosis-inducing factor, mitochondrion-associated, 2<br>2-hydroxyacyl-CoA lyase 1<br>glutamate-cysteine ligase, catalytic subunit                                                                                                                                                                                                                                                                                                                                                                                                                                                                                                                                                                                                                                                       | AOC3<br>ME3<br>ALDH6A1<br>NOX4<br>HPGD<br>NNT<br>AIFM2<br>HACL1<br>GCLC                                                                                                                                              |
| GO:0016247<br>Channel regulator<br>activity                   | (unnamed)<br>sorcin<br>cAMP-regulated phosphoprotein, 19kDa<br>potassium voltage-gated channel, shaker-related subfamily, beta member 1<br>neural precursor cell expressed, developmentally down-regulated 4-like<br>adrenergic, alpha-2A-, receptor                                                                                                                                                                                                                                                                                                                                                                                                                                                                                                                                                                                                                                                                                                                                                                                                                          | CHP<br>SRI<br>ARPP19<br>KCNAB1<br>NEDD4L<br>ADRA2A                                                                                                                                                                   |
| GO:0043406<br>Positive regulation of<br>MAP kinase activity   | phosphoinositide-3-kinase, catalytic, beta polypeptide<br>(unnamed)<br>superoxide dismutase 1, soluble (amyotrophic lateral sclerosis 1 (adult))<br>MyoD family inhibitor domain containing<br>epidermal growth factor receptor (erythroblastic leukemia viral (v-erb-b) oncogene homolog, avian)<br>adrenergic, beta-2-, receptor, surface<br>fibroblast growth factor 2 (basic)<br>adrenergic, alpha-2A-, receptor                                                                                                                                                                                                                                                                                                                                                                                                                                                                                                                                                                                                                                                          | PIK3CB<br>ZAK<br>SOD1<br>MDFIC<br>EGFR<br>ADRB2<br>FGF2<br>ADRA2A                                                                                                                                                    |
| GO:0007584<br>Response to nutrient                            | gastric inhibitory polypeptide receptor<br>peroxisome proliferative activated receptor, gamma<br>tubby like protein 4<br>ectonucleotide pyrophosphatase/phosphodiesterase 1<br>cyclin-dependent kinase inhibitor 2B (p15, inhibits CDK4)                                                                                                                                                                                                                                                                                                                                                                                                                                                                                                                                                                                                                                                                                                                                                                                                                                      | GIPR<br>PPARG<br>TULP4<br>ENPP1<br>CDKN2B                                                                                                                                                                            |
| GO:0015457<br>Auxiliary transport<br>protein activity         | (unnamed)<br>sorcin<br>cAMP-regulated phosphoprotein, 19kDa<br>potassium voltage-gated channel, shaker-related subfamily, beta member 1<br>neural precursor cell expressed, developmentally down-regulated 4-like<br>neuronatin<br>adrenergic, alpha-2A-, receptor                                                                                                                                                                                                                                                                                                                                                                                                                                                                                                                                                                                                                                                                                                                                                                                                            | CHP<br>SRI<br>ARPP19<br>KCNAB1<br>NEDD4L<br>NNAT<br>ADRA2A                                                                                                                                                           |
| GO:0051402<br>Neuron apoptosis                                | RAS p21 protein activator (GTPase activating protein) 1<br>superoxide dismutase 1, soluble (amyotrophic lateral sclerosis 1 (adult))<br>BCL2/adenovirus E1B 19kDa interacting protein 3<br>B-cell CLL/lymphoma 2                                                                                                                                                                                                                                                                                                                                                                                                                                                                                                                                                                                                                                                                                                                                                                                                                                                              | RASA1<br>SOD1<br>BNIP3<br>BCL2                                                                                                                                                                                       |
| GO:0008639<br>Small protein<br>conjugating enzyme<br>activity | ariadne homolog, ubiquitin-conjugating enzyme E2 binding protein, 1 (Drosophila)<br>autocrine motility factor receptor<br>ubiquitin-conjugating enzyme E2M (UBC12 homolog, yeast)<br>Cas-Br-M (murine) ecotropic retroviral transforming sequence<br>ubiquitin-conjugating enzyme E2L 3<br>ubiquitin protein ligase E3C<br>ubiquitin protein ligase E3 component n-recogin 5<br>tripartite motif-containing 23<br>ubiquitin-conjugating enzyme E2K<br>F-box protein 3<br>BRCA1 associated protein<br>ring finger protein 14<br>ring finger protein 144B<br>F-box and WD-40 domain protein 2<br>STIP1 homology and U-box containing protein 1<br>ring finger protein 217<br>SMAD specific E3 ubiquitin protein ligase 1<br>Parkinson disease (autosomal recessive, juvenile) 2, parkin<br>F-box protein 7<br>ubiquitin-conjugating enzyme E2H (UBC8 homolog, yeast)<br>myosin regulatory light chain interacting protein<br>ubiquitin protein ligase E3 component n-recogin 3 (putative)<br>CDC23 (cell division cycle 23, yeast, homolog)<br>TNF receptor-associated factor 6 | ARIH1<br>AMFR<br>UBE2M<br>CBL<br>UBE2L3<br>UBE3C<br>UBR5<br>TRIM23<br>UBE2K<br>FBXO3<br>BRAP<br>RNF14<br>RNF144B<br>FBXW2<br>STUB1<br>RNF217<br>SMURF1<br>PARK2<br>FBXO7<br>UBE2H<br>MYLIP<br>UBR3<br>CDC23<br>TRAF6 |

|                                                                                                    |                                                                                                                                                                                                                                                                                                                                                                                                                                                                                                                                                                                                                                                                                                                                                                                                                                                                                                                                                                                                                                                                                                                                                                                                                                                                                                                                                                                                                                                                                                                     |                                                                                                                                                                                                                                                                                                                                                                                                              |
|----------------------------------------------------------------------------------------------------|---------------------------------------------------------------------------------------------------------------------------------------------------------------------------------------------------------------------------------------------------------------------------------------------------------------------------------------------------------------------------------------------------------------------------------------------------------------------------------------------------------------------------------------------------------------------------------------------------------------------------------------------------------------------------------------------------------------------------------------------------------------------------------------------------------------------------------------------------------------------------------------------------------------------------------------------------------------------------------------------------------------------------------------------------------------------------------------------------------------------------------------------------------------------------------------------------------------------------------------------------------------------------------------------------------------------------------------------------------------------------------------------------------------------------------------------------------------------------------------------------------------------|--------------------------------------------------------------------------------------------------------------------------------------------------------------------------------------------------------------------------------------------------------------------------------------------------------------------------------------------------------------------------------------------------------------|
|                                                                                                    | zyg-11 related, cell cycle regulator                                                                                                                                                                                                                                                                                                                                                                                                                                                                                                                                                                                                                                                                                                                                                                                                                                                                                                                                                                                                                                                                                                                                                                                                                                                                                                                                                                                                                                                                                | ZER1                                                                                                                                                                                                                                                                                                                                                                                                         |
| GO:0016879<br>Ligase activity<br>forming carbon<br>nitrogen bonds                                  | <p>ariadne homolog, ubiquitin-conjugating enzyme E2 binding protein, 1 (Drosophila)</p> <p>autocrine motility factor receptor</p> <p>ubiquitin-conjugating enzyme E2M (UBC12 homolog, yeast)</p> <p>Cas-Br-M (murine) ecotropic retroviral transforming sequence</p> <p>ubiquitin-conjugating enzyme E2L 3</p> <p>glutathione synthetase</p> <p>ubiquitin protein ligase E3C</p> <p>ubiquitin protein ligase E3 component n-recogin 5</p> <p>tripartite motif-containing 23</p> <p>carbamoyl-phosphate synthetase 1, mitochondrial</p> <p>ubiquitin-conjugating enzyme E2K</p> <p>F-box protein 3</p> <p>BRCA1 associated protein</p> <p>ring finger protein 14</p> <p>ring finger protein 144B</p> <p>F-box and WD-40 domain protein 2</p> <p>STIP1 homology and U-box containing protein 1</p> <p>ring finger protein 217</p> <p>SMAD specific E3 ubiquitin protein ligase 1</p> <p>CTP synthase II</p> <p>Parkinson disease (autosomal recessive, juvenile) 2, parkin</p> <p>F-box protein 7</p> <p>ubiquitin-conjugating enzyme E2H (UBC8 homolog, yeast)</p> <p>myosin regulatory light chain interacting protein</p> <p>ubiquitin protein ligase E3 component n-recogin 3 (putative)</p> <p>CDC23 (cell division cycle 23, yeast, homolog)</p> <p>TNF receptor-associated factor 6</p> <p>methylenetetrahydrofolate dehydrogenase (NADP+ dependent) 1, methylenetetrahydrofolate cyclohydrolase, formyltetrahydrofolate synthetase</p> <p>biotinidase</p> <p>glutamate-cysteine ligase, catalytic subunit</p> | <p>ARIH1</p> <p>AMFR</p> <p>UBE2M</p> <p>CBL</p> <p>UBE2L3</p> <p>GSS</p> <p>UBE3C</p> <p>UBR5</p> <p>TRIM23</p> <p>CPS1</p> <p>UBE2K</p> <p>FBXO3</p> <p>BRAP</p> <p>RNF14</p> <p>RNF144B</p> <p>FBXW2</p> <p>STUB1</p> <p>RNF217</p> <p>SMURF1</p> <p>CTPS2</p> <p>PARK2</p> <p>FBXO7</p> <p>UBE2H</p> <p>MYLIP</p> <p>UBR3</p> <p>CDC23</p> <p>TRAF6</p> <p>ZER1</p> <p>MTHFD1</p> <p>BTD</p> <p>GCLC</p> |
| GO:0007178<br>Transmembrane<br>receptor protein<br>serine threonine<br>kinase signaling<br>pathway | <p>activin A receptor, type IB</p> <p>sclerosteosis</p> <p>latent transforming growth factor beta binding protein 2</p> <p>SMAD, mothers against DPP homolog 4 (Drosophila)</p> <p>bone morphogenetic protein receptor, type IA</p> <p>cell death-inducing DFFA-like effector a</p> <p>left-right determination factor 2</p> <p>SMAD, mothers against DPP homolog 5 (Drosophila)</p> <p>STIP1 homology and U-box containing protein 1</p> <p>SMAD specific E3 ubiquitin protein ligase 1</p> <p>activin A receptor type II-like 1</p> <p>growth differentiation factor 15</p> <p>transforming growth factor, beta receptor III (betaglycan, 300kDa)</p> <p>zinc finger, FYVE domain containing 9</p> <p>SMAD, mothers against DPP homolog 2 (Drosophila)</p> <p>activin A receptor, type IIA</p> <p>fibromodulin</p> <p>hydroxyprostaglandin dehydrogenase 15-(NAD)</p> <p>SMAD, mothers against DPP homolog 7 (Drosophila)</p> <p>activin A receptor, type I</p> <p>Chp/p300-interacting transactivator, with Glu/Asp-rich carboxy-terminal domain, 2</p> <p>growth differentiation factor 10</p> <p>cyclin-dependent kinase inhibitor 2B (p15, inhibits CDK4)</p>                                                                                                                                                                                                                                                                                                                                                 | <p>ACVR1B</p> <p>SOST</p> <p>LTBP2</p> <p>SMAD4</p> <p>BMPR1A</p> <p>CIDEA</p> <p>LEFTY2</p> <p>SMAD5</p> <p>STUB1</p> <p>SMURF1</p> <p>ACVRL1</p> <p>GDF15</p> <p>TGFBR3</p> <p>ZFYVE9</p> <p>SMAD2</p> <p>ACVR2A</p> <p>FMOD</p> <p>HPGD</p> <p>SMAD7</p> <p>ACVR1</p> <p>CITED2</p> <p>GDF10</p> <p>CDKN2B</p>                                                                                            |
| GO: 0016881<br>Acid amino acid<br>ligase activity                                                  | <p>ariadne homolog, ubiquitin-conjugating enzyme E2 binding protein, 1 (Drosophila)</p> <p>autocrine motility factor receptor</p> <p>ubiquitin-conjugating enzyme E2M (UBC12 homolog, yeast)</p> <p>Cas-Br-M (murine) ecotropic retroviral transforming sequence</p> <p>ubiquitin-conjugating enzyme E2L 3</p> <p>glutathione synthetase</p> <p>ubiquitin protein ligase E3C</p> <p>UBR5 ubiquitin protein ligase E3 component n-recogin 5</p> <p>tripartite motif-containing 23</p> <p>UBE2K ubiquitin-conjugating enzyme E2K</p> <p>F-box protein 3</p> <p>BRCA1 associated protein</p> <p>ring finger protein 14</p> <p>RNF144B ring finger protein 144B</p> <p>F-box and WD-40 domain protein 2</p>                                                                                                                                                                                                                                                                                                                                                                                                                                                                                                                                                                                                                                                                                                                                                                                                             | <p>ARIH1</p> <p>AMFR</p> <p>UBE2M</p> <p>CBL</p> <p>UBE2L3</p> <p>GSS</p> <p>UBE3C</p> <p>UBR5</p> <p>TRIM23</p> <p>UBE2K</p> <p>FBXO3</p> <p>BRAP</p> <p>RNF14</p> <p>RNF144B</p> <p>FBXW2</p>                                                                                                                                                                                                              |

|                                                                |                                                                                                                                                                                                                                                                                                                                                                                                                                                                                                                                                                                                                                                                                                                                                                                                                                                                                                                                                                                                                                                                                                                                                                                                                                                                                                                                                                                                                                                                                                                                                                                                                                                                                                                                                                                                                                                                                                                                                                                                                                                                                                                                                                                                                                                                                                                                                                                                                                                                                                                                                                                                                                                                                  |                                                                                                                                                                                                                                                                                                                                                                                                                                                                                                                                                                                                                                              |
|----------------------------------------------------------------|----------------------------------------------------------------------------------------------------------------------------------------------------------------------------------------------------------------------------------------------------------------------------------------------------------------------------------------------------------------------------------------------------------------------------------------------------------------------------------------------------------------------------------------------------------------------------------------------------------------------------------------------------------------------------------------------------------------------------------------------------------------------------------------------------------------------------------------------------------------------------------------------------------------------------------------------------------------------------------------------------------------------------------------------------------------------------------------------------------------------------------------------------------------------------------------------------------------------------------------------------------------------------------------------------------------------------------------------------------------------------------------------------------------------------------------------------------------------------------------------------------------------------------------------------------------------------------------------------------------------------------------------------------------------------------------------------------------------------------------------------------------------------------------------------------------------------------------------------------------------------------------------------------------------------------------------------------------------------------------------------------------------------------------------------------------------------------------------------------------------------------------------------------------------------------------------------------------------------------------------------------------------------------------------------------------------------------------------------------------------------------------------------------------------------------------------------------------------------------------------------------------------------------------------------------------------------------------------------------------------------------------------------------------------------------|----------------------------------------------------------------------------------------------------------------------------------------------------------------------------------------------------------------------------------------------------------------------------------------------------------------------------------------------------------------------------------------------------------------------------------------------------------------------------------------------------------------------------------------------------------------------------------------------------------------------------------------------|
|                                                                | <p>STIP1 homology and U-box containing protein 1<br/> RNF217 ring finger protein 217<br/> SMAD specific E3 ubiquitin protein ligase 1<br/> Parkinson disease (autosomal recessive, juvenile) 2, parkin<br/> F-box protein 7<br/> ubiquitin-conjugating enzyme E2H (UBC8 homolog, yeast)<br/> myosin regulatory light chain interacting protein<br/> UBR3 ubiquitin protein ligase E3 component n-recogin 3 (putative)<br/> CDC23 (cell division cycle 23, yeast, homolog)<br/> TNF receptor-associated factor 6<br/> ZER1 zyg-11 related, cell cycle regulator<br/> glutamate-cysteine ligase, catalytic subunit</p>                                                                                                                                                                                                                                                                                                                                                                                                                                                                                                                                                                                                                                                                                                                                                                                                                                                                                                                                                                                                                                                                                                                                                                                                                                                                                                                                                                                                                                                                                                                                                                                                                                                                                                                                                                                                                                                                                                                                                                                                                                                             | <p>STUB1<br/> RNF217<br/> SMURF1<br/> PARK2<br/> FBXO7<br/> UBE2H<br/> MYLIP<br/> UBR3<br/> CDC23<br/> TRAF6<br/> ZER1<br/> GCLC</p>                                                                                                                                                                                                                                                                                                                                                                                                                                                                                                         |
| <p>GO:0009653<br/> Anatomical structure<br/> morphogenesis</p> | <p>myocilin, trabecular meshwork inducible glucocorticoid response<br/> cell division cycle 42 (GTP binding protein, 25kDa)<br/> CDC42 binding protein kinase beta (DMPK-like)<br/> roundabout homolog 4, magic roundabout (Drosophila)<br/> trafficking protein particle complex 4<br/> tripartite motif-containing 15<br/> sex comb on midleg-like 1 (Drosophila)<br/> mitochondrial ribosomal protein L40<br/> discs, large homolog 1 (Drosophila)<br/> holocytochrome c synthase (cytochrome c heme-lyase)<br/> serpin peptidase inhibitor, clade F (alpha-2 antiplasmin, pigment epithelium derived factor), member 1<br/> eyes absent homolog 4 (Drosophila)<br/> ras homolog gene family, member B<br/> T-box 4<br/> angiominin<br/> ras-related C3 botulinum toxin substrate 3 (rho family, small GTP binding protein Rac3)<br/> activin A receptor type II-like 1<br/> vascular endothelial growth factor A<br/> endoplasmic reticulum aminopeptidase 1<br/> oligophrenin 1<br/> RAS p21 protein activator (GTPase activating protein) 1<br/> microtubule-associated protein 7<br/> Wolf-Hirschhorn syndrome candidate 1<br/> glycophorin C (Gerbich blood group)<br/> promyelocytic leukemia<br/> FYVE, RhoGEF and PH domain containing 4<br/> msh homeobox homolog 1 (Drosophila)<br/> fasciculation and elongation protein zeta 2 (zygin II)<br/> collagen, type V, alpha 3<br/> SMAD, mothers against DPP homolog 2 (Drosophila)<br/> forkhead box O4<br/> roundabout, axon guidance receptor, homolog 2 (Drosophila)<br/> paired-like homeodomain transcription factor 2<br/> microtubule-associated protein tau<br/> cadherin 13, H-cadherin (heart)<br/> vinculin<br/> NADPH oxidase 4<br/> CCAAT/enhancer binding protein (C/EBP), gamma<br/> clathrin, heavy chain-like 1<br/> Notch homolog 2 (Drosophila)<br/> FYVE, RhoGEF and PH domain containing 5<br/> enhancer of zeste homolog 1 (Drosophila)<br/> glyceronephosphate O-acyltransferase<br/> superoxide dismutase 1, soluble (amyotrophic lateral sclerosis 1 (adult))<br/> hairy/enhancer-of-split related with YRPW motif 1<br/> RAR-related orphan receptor B<br/> nuclear factor (erythroid-derived 2)-like 1<br/> seven in absentia homolog 1 (Drosophila)<br/> reticulon 4<br/> SRY (sex determining region Y)-box 13<br/> MLX interacting protein-like<br/> natriuretic peptide receptor A/guanylate cyclase A (atrionatriuretic peptide receptor A)<br/> Kallmann syndrome 1 sequence<br/> Notch homolog 3 (Drosophila)<br/> LIM domain and actin binding 1<br/> collagen, type IV, alpha 2<br/> melanoma cell adhesion molecule<br/> insulin-like growth factor 2 mRNA binding protein 2</p> | <p>MYOC<br/> CDC42<br/> CDC42BPB<br/> ROBO4<br/> TRAPPC4<br/> TRIM15<br/> SCML1<br/> MRPL40<br/> DLG1<br/> HCCS<br/> SERPINF1</p> <p>EYA4<br/> RHOB<br/> TBX4<br/> AMOT<br/> RAC3<br/> ACVRL1<br/> VEGFA<br/> ERAP1<br/> OPHN1<br/> RASA1<br/> MAP7<br/> WHSC1<br/> GYPC<br/> PML<br/> FGD4<br/> MSX1<br/> FEZ2<br/> COL5A3<br/> SMAD2<br/> FOXO4<br/> ROBO2<br/> PITX2<br/> MAPT<br/> CDH13<br/> VCL<br/> NOX4<br/> CEBPG<br/> CLTCL1<br/> NOTCH2<br/> FGD5<br/> EZH1<br/> GNPAT<br/> SOD1<br/> HEY1<br/> RORB<br/> NFE2L1<br/> SIAH1<br/> RTN4<br/> SOX13<br/> MLXIPL<br/> NPR1<br/> KAL1<br/> NOTCH3<br/> LIMA1<br/> COL4A2<br/> MCAM</p> |



|  |                                                                                                                                                                                                                                                                                                                                                                                                                                                                                                                                           |                                                                                                                                          |
|--|-------------------------------------------------------------------------------------------------------------------------------------------------------------------------------------------------------------------------------------------------------------------------------------------------------------------------------------------------------------------------------------------------------------------------------------------------------------------------------------------------------------------------------------------|------------------------------------------------------------------------------------------------------------------------------------------|
|  | paired box gene 3 (Waardenburg syndrome 1)<br>glutamate-cysteine ligase, catalytic subunit<br>T-box 3 (ulnar mammary syndrome)<br>fibroblast growth factor 16<br>pleckstrin homology-like domain, family A, member 3<br>T-box 5<br>engrailed homolog 1<br>homeobox B5<br>carboxypeptidase M<br>homeobox A4<br>wingless-type MMTV integration site family, member 11<br>fibroblast growth factor 2 (basic)<br>glypican 3<br>mab-21-like 1 (C. elegans)<br>twist homolog 1 (acrocephalosyndactyly 3; Saethre-Chotzen syndrome) (Drosophila) | IGF2BP2<br>PAX3<br>GCLC<br>TBX3<br>FGF16<br>PHLDA3<br>TBX5<br>EN1<br>HOXB5<br>CPM<br>HOXA4<br>WNT11<br>FGF2<br>GPC3<br>MAB21L1<br>TWIST1 |
|--|-------------------------------------------------------------------------------------------------------------------------------------------------------------------------------------------------------------------------------------------------------------------------------------------------------------------------------------------------------------------------------------------------------------------------------------------------------------------------------------------------------------------------------------------|------------------------------------------------------------------------------------------------------------------------------------------|

**Table S3.** Genes demonstrating core enrichment within the 1 gene ontology gene set identified as statistically significant by Gene Set Enrichment Analysis in EATCAD versus EATCnt.

| Gene set                                                           | Gene name                                                                                                                                                                                                                                                             | Symbol                                                      |
|--------------------------------------------------------------------|-----------------------------------------------------------------------------------------------------------------------------------------------------------------------------------------------------------------------------------------------------------------------|-------------------------------------------------------------|
| GO:0050906<br>Detection of stimulus involved in sensory perception | receptor transporter protein 4<br>taste receptor, type 2, member 43<br>phosducin<br>S-antigen; retina and pineal gland (arrestin)<br>calcium channel, voltage-dependent, alpha 1F subunit<br>taste receptor, type 2, member 14<br>G protein-coupled receptor kinase 1 | RTP4<br>TAS2R43<br>PDC<br>SAG<br>CACNA1F<br>TAS2R14<br>GRK1 |

**Table S4.** Genes demonstrating core enrichment within the 15 gene ontology gene sets identified as statistically significant by Gene Set Enrichment Analysis in EATCnt versus EATCAD.

| Gene set                                        | Gene name                                                                                                                                                                                                                                                                                                                                                                                                                                                                                                                                                                                                                                                                                                                                                                                                                                                 | Symbol                                                                                                                                                         |
|-------------------------------------------------|-----------------------------------------------------------------------------------------------------------------------------------------------------------------------------------------------------------------------------------------------------------------------------------------------------------------------------------------------------------------------------------------------------------------------------------------------------------------------------------------------------------------------------------------------------------------------------------------------------------------------------------------------------------------------------------------------------------------------------------------------------------------------------------------------------------------------------------------------------------|----------------------------------------------------------------------------------------------------------------------------------------------------------------|
| GO:0030166<br>Proteoglycan biosynthetic process | exostoses (multiple) 1<br>carbohydrate (N-acetylglucosamine 6-O) sulfotransferase 7<br>carbohydrate (chondroitin 6) sulfotransferase 3<br>chondroitin sulfate N-acetylgalactosaminyltransferase 2                                                                                                                                                                                                                                                                                                                                                                                                                                                                                                                                                                                                                                                         | EXT1<br>CHST7<br>CHST3<br>CSGALNACT2                                                                                                                           |
| GO:0008080<br>N acyltransferase activity        | K(lysine) acetyltransferase 6B<br>CREB binding protein (Rubinstein-Taybi syndrome)<br>arylalkylamine N-acetyltransferase<br>general transcription factor IIIC, polypeptide 4, 90kDa<br>ceramide synthase 5<br>TAF5 RNA polymerase II, TATA box binding protein (TBP)-associated factor, 100kDa<br>spermidine/spermine N1-acetyltransferase 1<br>N-acetyltransferase 1 (arylamine N-acetyltransferase)<br>K(lysine) acetyltransferase 6A<br>N-acetyltransferase 2 (arylamine N-acetyltransferase)<br>histone acetyltransferase 1<br>aminolevulinate, delta-, synthase 2 (sideroblastic/hypochromic anemia)                                                                                                                                                                                                                                                 | KAT6B<br>CREBBP<br>AANAT<br>GTF3C4<br>CERS5<br>TAF5<br>SAT1<br>NAT1<br>KAT6A<br>NAT2<br>HAT1<br>ALAS2                                                          |
| GO:0008270<br>Zinc ion binding                  | methionine sulfoxide reductase B3<br>seven in absentia homolog 1 (Drosophila)<br>cysteine-rich protein 1 (intestinal)<br>matrix metalloproteinase 2 (gelatinase A, 72kDa gelatinase, 72kDa type IV collagenase)<br>RAB interacting factor<br>leucyl/cystinyl aminopeptidase<br>phosphate regulating endopeptidase homolog, X-linked (hypophosphatemia, vitamin D resistant rickets)<br>early endosome antigen 1, 162kD<br>selenoprotein X, 1<br>myoneurin<br>carbonic anhydrase II<br>ring finger protein 11<br>zinc finger protein 185 (LIM domain)<br>cytidine deaminase<br>rearranged L-myc fusion<br>S100 calcium binding protein A12<br>Kruppel-like factor 7 (ubiquitous)<br>matrix metalloproteinase 14 (membrane-inserted)<br>Cas-Br-M (murine) ecotropic retroviral transforming sequence b<br>matrix metalloproteinase 12 (macrophage elastase) | MSRB3<br>SIAH1<br>CRIP1<br>MMP2<br>RABIF<br>LNPEP<br>PHEX<br>EEA1<br>SEPX1<br>MYNN<br>CA2<br>RNF11<br>ZNF185<br>CDA<br>RLF<br>S100A12<br>KLF7<br>MMP14<br>CBLB |

|                                                    |                                                                                                                                                                                                                                                                                                                                                                                                                                                                                                                                                                                                                                                                                                                                                                                                                                                                                                                                                                                                                                                                                                                                                                                                                                                                                                                                                                                                                                                                                                                                                                                                                                                                                                                                                                                                                                                                                                                                                                                                                                                                                                                                                                                                                                                                                                                 |                                                                                                                                                                                                                                                                                                                                                                                                                                                              |
|----------------------------------------------------|-----------------------------------------------------------------------------------------------------------------------------------------------------------------------------------------------------------------------------------------------------------------------------------------------------------------------------------------------------------------------------------------------------------------------------------------------------------------------------------------------------------------------------------------------------------------------------------------------------------------------------------------------------------------------------------------------------------------------------------------------------------------------------------------------------------------------------------------------------------------------------------------------------------------------------------------------------------------------------------------------------------------------------------------------------------------------------------------------------------------------------------------------------------------------------------------------------------------------------------------------------------------------------------------------------------------------------------------------------------------------------------------------------------------------------------------------------------------------------------------------------------------------------------------------------------------------------------------------------------------------------------------------------------------------------------------------------------------------------------------------------------------------------------------------------------------------------------------------------------------------------------------------------------------------------------------------------------------------------------------------------------------------------------------------------------------------------------------------------------------------------------------------------------------------------------------------------------------------------------------------------------------------------------------------------------------|--------------------------------------------------------------------------------------------------------------------------------------------------------------------------------------------------------------------------------------------------------------------------------------------------------------------------------------------------------------------------------------------------------------------------------------------------------------|
|                                                    | guanine deaminase<br>matrix metalloproteinase 8 (neutrophil collagenase)                                                                                                                                                                                                                                                                                                                                                                                                                                                                                                                                                                                                                                                                                                                                                                                                                                                                                                                                                                                                                                                                                                                                                                                                                                                                                                                                                                                                                                                                                                                                                                                                                                                                                                                                                                                                                                                                                                                                                                                                                                                                                                                                                                                                                                        | MMP12<br>GDA<br>MMP8                                                                                                                                                                                                                                                                                                                                                                                                                                         |
| GO:0016044<br>Membrane organization and biogenesis | epidermal growth factor receptor (erythroblastic leukemia viral (v-erb-b) oncogene homolog, avian)<br>sorting nexin 4<br>low density lipoprotein receptor (familial hypercholesterolemia)<br>asialoglycoprotein receptor 1<br>macrophage scavenger receptor 1<br>ATPase, H <sup>+</sup> transporting, lysosomal 50/57kDa, V1 subunit H<br>coronin, actin binding protein, 1C<br>RAB22A, member RAS oncogene family<br>golgi SNAP receptor complex member 2<br>superoxide dismutase 1, soluble (amyotrophic lateral sclerosis 1 (adult))<br>optic atrophy 1 (autosomal dominant)<br>adaptor-related protein complex 2, sigma 1 subunit<br>PDZ and LIM domain 7 (enigma)<br>Rho GTPase activating protein 27<br>sorting nexin 2<br>rabaptin, RAB GTPase binding effector protein 1<br>VAMP (vesicle-associated membrane protein)-associated protein A, 33kDa<br>syntaxin 11<br>dynamin 1-like<br>coiled-coil domain containing 88A<br>izumo sperm-egg fusion 1<br>Cas-BR-M (murine) ecotropic retroviral transforming sequence<br>Sad1 and UNC84 domain containing 2<br>phospholipid scramblase 1<br>N-ethylmaleimide-sensitive factor attachment protein, gamma<br>stabilin 1<br>phosphatidylinositol binding clathrin assembly protein<br>myosin VI<br>amphiphysin (Stiff-Man syndrome with breast cancer 128kDa autoantigen)<br>GULP, engulfment adaptor PTB domain containing 1<br>Fc fragment of IgG, high affinity Ia, receptor (CD64)<br>RAB interacting factor<br>vacuolar protein sorting 4 homolog B (S. cerevisiae)<br>azurocidin 1 (cationic antimicrobial protein 37)<br>ADAM metalloproteinase domain 12 (meltrin alpha)<br>early endosome antigen 1, 162kD<br>low density lipoprotein receptor-related protein 8, apolipoprotein e receptor<br>BCL2-like 1<br>sortilin-related receptor, L(DLR class) A repeats-containing<br>synaptojanin 1<br>lymphoid-restricted membrane protein<br>ficolin (collagen/fibrinogen domain containing) 1<br>C-type lectin domain family 7, member A<br>insulin-like growth factor 2 receptor<br>RAB5A, member RAS oncogene family<br>BCL2/adenovirus E1B 19kDa interacting protein 1<br>zinc finger, FYVE domain containing 16<br>granulein, EF-hand calcium binding protein<br>potassium voltage-gated channel, subfamily H (eag-related), member 1<br>dynamin 1 | EGFR<br>SNX4<br>LDLR<br>ASGR1<br>MSR1<br>ATP6V1H<br>CORO1C<br>RAB22A<br>GOSR2<br>SOD1<br>OPA1<br>AP2S1<br>PDLIM7<br>ARHGAP27<br>SNX2<br>RABEP1<br>VAPA<br>STX11<br>DNM1L<br>CCDC88A<br>IZUMO1<br>CBL<br>SUN2<br>PLSCR1<br>NAPG<br>STAB1<br>PICALM<br>MYO6<br>AMPH<br>GULP1<br>FCGR1A<br>RABIF<br>VPS4B<br>AZU1<br>ADAM12<br>EEA1<br>LRP8<br>BCL2L1<br>SORL1<br>SYNJ1<br>LRMP<br>FCN1<br>CLEC7A<br>IGF2R<br>RAB5A<br>BNIP1<br>ZFYVE16<br>GCA<br>KCNH1<br>DNM1 |
| GO:0046914<br>Transition metal ion binding         | methionine sulfoxide reductase B3<br>seven in absentia homolog 1 (Drosophila)<br>v-abl Abelson murine leukemia viral oncogene homolog 2 (arg, Abelson-related gene)<br>cysteine-rich protein 1 (intestinal)<br>matrix metalloproteinase 2 (gelatinase A, 72kDa gelatinase, 72kDa type IV collagenase)<br>RAB interacting factor<br>leucyl/cystinyl aminopeptidase<br>phosphate regulating endopeptidase homolog, X-linked (hypophosphatemia, vitamin D resistant rickets)<br>early endosome antigen 1, 162kD<br>selenoprotein X, 1<br>myoneurin<br>carbonic anhydrase II<br>ring finger protein 11<br>zinc finger protein 185 (LIM domain)<br>cytidine deaminase<br>rearranged L-myc fusion<br>S100 calcium binding protein A12                                                                                                                                                                                                                                                                                                                                                                                                                                                                                                                                                                                                                                                                                                                                                                                                                                                                                                                                                                                                                                                                                                                                                                                                                                                                                                                                                                                                                                                                                                                                                                                 | MSRB3<br>SHAH1<br>ABL2<br>CRIP1<br>MMP2<br>RABIF<br>LNPEP<br>PHEX<br><br>EEA1<br>SEPX1<br>MYNN<br>CA2<br>RNF11<br>ZNF185<br>CDA<br>RLF                                                                                                                                                                                                                                                                                                                       |

|                                                                            |                                                                                                                                                                                                                                                                                                                                                                                                                                                                                                                                                                                                                                                                                                                                                                                                                                                                                                                                                                                                                                                                                                                                                                                                                                                                                                                                                                                                                                                                                                                                                                                                                                                                                                                                                                                                                                                                                                                                                                                                                                                                |                                                                                                                                                                                                                                                                                                                                                                                           |
|----------------------------------------------------------------------------|----------------------------------------------------------------------------------------------------------------------------------------------------------------------------------------------------------------------------------------------------------------------------------------------------------------------------------------------------------------------------------------------------------------------------------------------------------------------------------------------------------------------------------------------------------------------------------------------------------------------------------------------------------------------------------------------------------------------------------------------------------------------------------------------------------------------------------------------------------------------------------------------------------------------------------------------------------------------------------------------------------------------------------------------------------------------------------------------------------------------------------------------------------------------------------------------------------------------------------------------------------------------------------------------------------------------------------------------------------------------------------------------------------------------------------------------------------------------------------------------------------------------------------------------------------------------------------------------------------------------------------------------------------------------------------------------------------------------------------------------------------------------------------------------------------------------------------------------------------------------------------------------------------------------------------------------------------------------------------------------------------------------------------------------------------------|-------------------------------------------------------------------------------------------------------------------------------------------------------------------------------------------------------------------------------------------------------------------------------------------------------------------------------------------------------------------------------------------|
|                                                                            | Kruppel-like factor 7 (ubiquitous)<br>matrix metalloproteinase 14 (membrane-inserted)<br>Cas-Br-M (murine) ecotropic retroviral transforming sequence b<br>matrix metalloproteinase 12 (macrophage elastase)<br>guanine deaminase<br>matrix metalloproteinase 8 (neutrophil collagenase)                                                                                                                                                                                                                                                                                                                                                                                                                                                                                                                                                                                                                                                                                                                                                                                                                                                                                                                                                                                                                                                                                                                                                                                                                                                                                                                                                                                                                                                                                                                                                                                                                                                                                                                                                                       | S100A12<br>KLF7<br>MMP14<br>CBLB<br>MMP12<br>GDA<br>MMP8                                                                                                                                                                                                                                                                                                                                  |
| GO:0051128<br>Regulation of Cellular component organization and biogenesis | nexilin (F actin binding protein)<br>cytoplasmic linker associated protein 1<br>RAS p21 protein activator (GTPase activating protein) 1<br>ArfGAP with RhoGAP domain, ankyrin repeat and PH domain 1<br>cysteine-rich PAK1 inhibitor<br>tousled-like kinase 1<br>FYVE, RhoGEF and PH domain containing 2<br>Rho guanine nucleotide exchange factor (GEF) 10-like<br>eukaryotic translation initiation factor 3, subunit A<br>adaptor-related protein complex 2, sigma 1 subunit<br>eukaryotic translation initiation factor 2B, subunit 2 beta, 39kDa<br>poly(A) binding protein interacting protein 2<br>CDC42 effector protein (Rho GTPase binding) 5<br>coiled-coil domain containing 88A<br>eukaryotic translation initiation factor 2 alpha kinase 4<br>sorbin and SH3 domain containing 3<br>Cas-Br-M (murine) ecotropic retroviral transforming sequence<br>ubiquitin-conjugating enzyme E2N (UBC13 homolog, yeast)<br>gelsolin (amyloidosis, Finnish type)<br>interleukin-1 receptor-associated kinase 3<br>ghrelin/obestatin preprohormone<br>tubulin polymerization promoting protein<br>MID1 interacting protein 1 (gastrulation specific G12 homolog (zebrafish))<br>eukaryotic translation initiation factor 2-alpha kinase 3<br>rho/rac guanine nucleotide exchange factor (GEF) 2<br>cell division cycle 42 (GTP binding protein, 25kDa)<br>eukaryotic translation initiation factor 1B<br>eukaryotic translation termination factor 1<br>ArfGAP with RhoGAP domain, ankyrin repeat and PH domain 3<br>azuocidin 1 (cationic antimicrobial protein 37)<br>adenomatosis polyposis coli<br>tyrosine 3-monooxygenase/tryptophan 5-monooxygenase activation protein, eta polypeptide<br>CDC42 effector protein (Rho GTPase binding) 2<br>microtubule-associated protein, RP/EB family, member 1<br>serine/threonine kinase 38 like<br>reticulon 4<br>leucine rich repeat containing 4C<br>eukaryotic translation initiation factor 3, subunit J<br>zinc finger, FYVE domain containing 16<br>ubiquitin B<br>FYVE, RhoGEF and PH domain containing 4 | NEXN<br>CLASP1<br>RASA1<br>ARAP1<br>CRIPAK<br>TLK1<br>FGD2<br>ARHGEF10L<br>EIF3A<br>AP2S1<br>EIF2B2<br>PAIP2<br>CDC42EP5<br>CCDC88A<br>EIF2AK4<br>SORBS3<br>CBL<br>UBE2N<br>GSN<br>IRAK3<br>GHRL<br>TPPP<br>MID1IP1<br>EIF2AK3<br>ARHGEF2<br>CDC42<br>EIF1B<br>ETF1<br>ARAP3<br>AZU1<br>APC<br>YWHAH<br>CDC42EP2<br>MAPRE1<br>STK38L<br>RTN4<br>LRRC4C<br>EIF3J<br>ZFYVE16<br>UBB<br>FGD4 |
| GO:0051347<br>Positive regulation of transferase activity                  | amyotrophic lateral sclerosis 2 (juvenile)<br>superoxide dismutase 1, soluble (amyotrophic lateral sclerosis 1 (adult))<br>endoplasmic reticulum to nucleus signalling 1<br>sphingosine-1-phosphate receptor 2<br>serine incorporator 1<br>cholinergic receptor, muscarinic 1<br>STE20-related kinase adaptor beta<br>cyclin D2<br>coiled-coil domain containing 88A<br>chemokine (C-X-C motif) receptor 4<br>mitogen-activated protein kinase kinase kinase 2<br>ghrelin/obestatin preprohormone<br>serine incorporator 5<br>MyoD family inhibitor domain containing<br>epidermal growth factor (beta-urogastrone)<br>growth arrest and DNA-damage-inducible, gamma<br>p21/Cdc42/Rac1-activated kinase 1 (STE20 homolog, yeast)<br>mucosa associated lymphoid tissue lymphoma translocation gene 1<br>azuocidin 1 (cationic antimicrobial protein 37)<br>prolactin receptor<br>interleukin-1 receptor-associated kinase 1<br>TNF receptor-associated factor 6                                                                                                                                                                                                                                                                                                                                                                                                                                                                                                                                                                                                                                                                                                                                                                                                                                                                                                                                                                                                                                                                                                 | ALS2<br>SOD1<br>ERN1<br>S1PR2<br>SERINC1<br>CHRM1<br>STRADB<br>CCND2<br>CCDC88A<br>CXCR4<br>MAP3K2<br>GHRL<br>SERINC5<br>MDFIC<br>EGF<br>GADD45G<br>PAK1<br>MALT1<br>AZU1<br>PRLR<br>IRAK1<br>TRAF6                                                                                                                                                                                       |

|                                                         |                                                                                                                                                                                                                                                                                                                                                                                                                                                                                                                                                                                                                                                                                                                                                                                                                                                                                                                                                                                                                                                                                                                                                                                                                                       |                                                                                                                                                                                                                                                                                                            |
|---------------------------------------------------------|---------------------------------------------------------------------------------------------------------------------------------------------------------------------------------------------------------------------------------------------------------------------------------------------------------------------------------------------------------------------------------------------------------------------------------------------------------------------------------------------------------------------------------------------------------------------------------------------------------------------------------------------------------------------------------------------------------------------------------------------------------------------------------------------------------------------------------------------------------------------------------------------------------------------------------------------------------------------------------------------------------------------------------------------------------------------------------------------------------------------------------------------------------------------------------------------------------------------------------------|------------------------------------------------------------------------------------------------------------------------------------------------------------------------------------------------------------------------------------------------------------------------------------------------------------|
|                                                         | <p>epiregulin<br/> formyl peptide receptor 1<br/> complement component 5a receptor 1<br/> prokineticin 2<br/> mitogen-activated protein kinase kinase kinase 5<br/> mitogen-activated protein kinase kinase 3<br/> toll-like receptor 6</p>                                                                                                                                                                                                                                                                                                                                                                                                                                                                                                                                                                                                                                                                                                                                                                                                                                                                                                                                                                                           | <p>EREG<br/> FPR1<br/> C5AR1<br/> PROK2<br/> MAP3K5<br/> MAP2K3<br/> TLR6</p>                                                                                                                                                                                                                              |
| <p>GO:0006984<br/> ER nuclear signaling pathway</p>     | <p>cysteine-rich PAK1 inhibitor<br/> SREBF chaperone<br/> Rho guanine nucleotide exchange factor (GEF) 10-like<br/> endoplasmic reticulum to nucleus signalling 1<br/> activating transcription factor 6<br/> eukaryotic translation initiation factor 2-alpha kinase 3<br/> p21/Cdc42/Rac1-activated kinase 1 (STE20 homolog, yeast)<br/> VCP-interacting membrane protein</p>                                                                                                                                                                                                                                                                                                                                                                                                                                                                                                                                                                                                                                                                                                                                                                                                                                                       | <p>CRIPAK<br/> SCAP<br/> ARHGEF10L<br/> ERN1<br/> ATF6<br/> EIF2AK3<br/> PAK1<br/> SELS</p>                                                                                                                                                                                                                |
| <p>GO:0008234<br/> Cysteine type peptidase activity</p> | <p>ubiquitin specific peptidase 4 (proto-oncogene)<br/> ubiquitin specific peptidase 7 (herpes virus-associated)<br/> ubiquitin specific peptidase 14 (tRNA-guanine transglycosylase)<br/> ubiquitin specific peptidase 16<br/> ubiquitin carboxyl-terminal esterase L3 (ubiquitin thiolesterase)<br/> ubiquitin specific peptidase 8<br/> ATG4 autophagy related 4 homolog B (S. cerevisiae)<br/> ubiquitin specific peptidase 9, X-linked<br/> cathepsin K (pseudodeficiency)<br/> cathepsin S<br/> caspase 8, apoptosis-related cysteine peptidase<br/> ubiquitin specific peptidase 53<br/> legumain<br/> valosin containing protein (p97)/p47 complex interacting protein 1<br/> ubiquitin specific peptidase 12<br/> ubiquitin specific peptidase 6 (Tre-2 oncogene)<br/> ubiquitin specific peptidase 15<br/> caspase 3, apoptosis-related cysteine peptidase<br/> ubiquitin carboxyl-terminal esterase L1 (ubiquitin thiolesterase)<br/> protein disulfide isomerase family A, member 3</p>                                                                                                                                                                                                                                   | <p>USP4<br/> USP7<br/> USP14<br/> USP16<br/> UCHL3<br/> USP8<br/> ATG4B<br/> USP9X<br/> CTSK<br/> CTSS<br/> CASP8<br/> USP53<br/> LGMN<br/> VCIPI1<br/> USP12<br/> USP6<br/> USP15<br/> CASP3<br/> UCHL1<br/> PDIA3</p>                                                                                    |
| <p>GO:0008144<br/> Drug binding</p>                     | <p>peptidylprolyl isomerase G (cyclophilin G)<br/> topoisomerase (DNA) II alpha 170kDa<br/> peptidylprolyl isomerase C (cyclophilin C)<br/> FK506 binding protein 4, 59kDa<br/> FK506 binding protein 3, 25kDa<br/> nuclear factor of activated T-cells, cytoplasmic, calcineurin-dependent 1<br/> peptidylprolyl isomerase D (cyclophilin D)</p>                                                                                                                                                                                                                                                                                                                                                                                                                                                                                                                                                                                                                                                                                                                                                                                                                                                                                     | <p>PP1G<br/> TOP2A<br/> PP1C<br/> FKBP4<br/> FKBP3<br/> NFATC1<br/> PP1D</p>                                                                                                                                                                                                                               |
| <p>GO:0006508<br/> Proteolysis</p>                      | <p>cathepsin B<br/> ADAM metallopeptidase domain 10<br/> tripeptidyl peptidase II<br/> cathepsin G<br/> ubiquitin protein ligase E3 component n-recogin 3 (putative)<br/> proprotein convertase subtilisin/kexin type 5<br/> furin (paired basic amino acid cleaving enzyme)<br/> ubiquitin protein ligase E3 component n-recogin 5<br/> von Hippel-Lindau tumor suppressor<br/> synovial apoptosis inhibitor 1, synoviolin<br/> astacin-like metallo-endopeptidase (M12 family)<br/> ubiquitin-like modifier activating enzyme 3<br/> DnaJ (Hsp40) homolog, subfamily C, member 1<br/> plasminogen activator, urokinase<br/> zinc metallopeptidase (STE24 homolog, yeast)<br/> cathepsin H<br/> ubiquitination factor E4B (UFD2 homolog, yeast)<br/> matrix metallopeptidase 9 (gelatinase B, 92kDa gelatinase, 92kDa type IV collagenase)<br/> complement factor D (adipsin)<br/> ubiquitin-conjugating enzyme E2K<br/> ubiquitin specific peptidase 33<br/> ubiquitin-conjugating enzyme E2N (UBC13 homolog, yeast)<br/> cathepsin Z<br/> F-box protein 7<br/> ubiquitin-conjugating enzyme E2D 3 (UBC4/5 homolog, yeast)<br/> seven in absentia homolog 1 (Drosophila)<br/> peptidase D<br/> carboxypeptidase A1 (pancreatic)</p> | <p>CTSB<br/> ADAM10<br/> TPP2<br/> CTSG<br/> UBR3<br/> PCSK5<br/> FURIN<br/> UBR5<br/> VHL<br/> SYVN1<br/> ASTL<br/> UBA3<br/> DNAJC1<br/> PLAU<br/> ZMPSTE24<br/> CTSH<br/> UBE4B<br/> MMP9<br/> CFD<br/> UBE2K<br/> USP33<br/> UBE2N<br/> CTSZ<br/> FBXO7<br/> UBE2D3<br/> SIAH1<br/> PEPD<br/> CPA1</p> |

|                                                          |                                                                                                                                                                                                                                                                                                                                                                                                                                                                                                                                                                                                                                                                                                                                                                                                                                                                                                                                                                                                                                                                                                                                                                                                                                                                                                                                                                                                                                                                                                                                                                                                                                                                                                                                                       |                                                                                                                                                                                                                                                                                                                                                                                        |
|----------------------------------------------------------|-------------------------------------------------------------------------------------------------------------------------------------------------------------------------------------------------------------------------------------------------------------------------------------------------------------------------------------------------------------------------------------------------------------------------------------------------------------------------------------------------------------------------------------------------------------------------------------------------------------------------------------------------------------------------------------------------------------------------------------------------------------------------------------------------------------------------------------------------------------------------------------------------------------------------------------------------------------------------------------------------------------------------------------------------------------------------------------------------------------------------------------------------------------------------------------------------------------------------------------------------------------------------------------------------------------------------------------------------------------------------------------------------------------------------------------------------------------------------------------------------------------------------------------------------------------------------------------------------------------------------------------------------------------------------------------------------------------------------------------------------------|----------------------------------------------------------------------------------------------------------------------------------------------------------------------------------------------------------------------------------------------------------------------------------------------------------------------------------------------------------------------------------------|
|                                                          | <p>matrix metallopeptidase 2 (gelatinase A, 72kDa gelatinase, 72kDa type IV collagenase)<br/> F-box and leucine-rich repeat protein 6<br/> presenilin 1 (Alzheimer disease 3)<br/> ATG4 autophagy related 4 homolog B (<i>S. cerevisiae</i>)<br/> CDC20 cell division cycle 20 homolog (<i>S. cerevisiae</i>)<br/> leucyl/cystinyl aminopeptidase<br/> phosphate regulating endopeptidase homolog, X-linked (hypophosphatemia, vitamin D resistant rickets)<br/> pappalysin 2<br/> cathepsin K (pycnodysostosis)<br/> dipeptidyl-peptidase 3<br/> carboxypeptidase Q<br/> cathepsin S<br/> caspase 8, apoptosis-related cysteine peptidase<br/> keratin 1 (epidermolytic hyperkeratosis)<br/> serglycin<br/> RCE1 homolog, prenyl protein peptidase (<i>S. cerevisiae</i>)<br/> ATPase, H<sup>+</sup> transporting, lysosomal accessory protein 2<br/> ring finger protein 11<br/> VCP-interacting membrane protein<br/> suppression of tumorigenicity 14 (colon carcinoma)<br/> matrix metallopeptidase 7 (matrilysin, uterine)<br/> seven in absentia homolog 2 (<i>Drosophila</i>)<br/> proteasome (prosome, macropain) 26S subunit, non-ATPase, 14<br/> ubiquitin-conjugating enzyme E2D 1 (UBC4/5 homolog, yeast)<br/> matrix metallopeptidase 3 (stromelysin 1, progelatinase)<br/> matrix metallopeptidase 14 (membrane-inserted)<br/> ubiquitin B<br/> ADAM metallopeptidase with thrombospondin type 1 motif, 5 (aggrecanase-2)<br/> matrix metallopeptidase 12 (macrophage elastase)<br/> caspase 3, apoptosis-related cysteine peptidase<br/> proprotein convertase subtilisin/kexin type 1<br/> ubiquitin-conjugating enzyme E2B (RAD6 homolog)<br/> ring finger protein 144B<br/> matrix metallopeptidase 8 (neutrophil collagenase)</p> | <p>MMP2<br/> FBXL6<br/> PSEN1<br/> ATG4B<br/> CDC20<br/> LNPEP<br/> PHEX<br/> <br/> PAPPA2<br/> CTSK<br/> DPP3<br/> PGCP<br/> CTSS<br/> CASP8<br/> KRT1<br/> SRGN<br/> RCE1<br/> ATP6AP2<br/> RNF11<br/> SELS<br/> ST14<br/> MMP7<br/> SLAH2<br/> PSMD14<br/> UBE2D1<br/> MMP3<br/> MMP14<br/> UBB<br/> ADAMTS5<br/> MMP12<br/> CASP3<br/> PCSK1<br/> UBE2B<br/> RNF144B<br/> MMP8</p> |
| GO:0004197<br>Cysteine type<br>endopeptidase<br>activity | <p>ubiquitin specific peptidase 4 (proto-oncogene)<br/> ubiquitin specific peptidase 7 (herpes virus-associated)<br/> ubiquitin specific peptidase 14 (tRNA-guanine transglycosylase)<br/> ubiquitin specific peptidase 16<br/> ubiquitin specific peptidase 8<br/> ubiquitin specific peptidase 9, X-linked<br/> cathepsin K (pycnodysostosis)<br/> cathepsin S<br/> caspase 8, apoptosis-related cysteine peptidase<br/> legumain<br/> ubiquitin specific peptidase 6 (Tre-2 oncogene)<br/> ubiquitin specific peptidase 15<br/> caspase 3, apoptosis-related cysteine peptidase<br/> ubiquitin carboxyl-terminal esterase L1 (ubiquitin thiolesterase)<br/> protein disulfide isomerase family A, member 3</p>                                                                                                                                                                                                                                                                                                                                                                                                                                                                                                                                                                                                                                                                                                                                                                                                                                                                                                                                                                                                                                     | <p>USP4<br/> USP7<br/> USP14<br/> USP16<br/> USP8<br/> USP9X<br/> CTSK<br/> CTSS<br/> CASP8<br/> LGMIN<br/> USP6<br/> USP15<br/> CASP3<br/> UCHL1<br/> PDIA3</p>                                                                                                                                                                                                                       |
| GO:0006944<br>Membrane fusion                            | <p>golgi SNAP receptor complex member 2<br/> rabaptin, RAB GTPase binding effector protein 1<br/> VAMP (vesicle-associated membrane protein)-associated protein A, 33kDa<br/> syntaxin 11<br/> izumo sperm-egg fusion 1<br/> N-ethylmaleimide-sensitive factor attachment protein, gamma<br/> RAB interacting factor<br/> vacuolar protein sorting 4 homolog B (<i>S. cerevisiae</i>)<br/> ADAM metallopeptidase domain 12 (meltrin alpha)<br/> early endosome antigen 1, 162kD<br/> lymphoid-restricted membrane protein<br/> BCL2/adenovirus E1B 19kDa interacting protein 1<br/> grancalcin, EF-hand calcium binding protein<br/> potassium voltage-gated channel, subfamily H (eag-related), member 1</p>                                                                                                                                                                                                                                                                                                                                                                                                                                                                                                                                                                                                                                                                                                                                                                                                                                                                                                                                                                                                                                         | <p>GOSR2<br/> RABEP1<br/> VAPA<br/> STX11<br/> IZUMO1<br/> NAPG<br/> RABIF<br/> VPS4B<br/> ADAM12<br/> EEA1<br/> LRMP<br/> BNIP1<br/> GCA<br/> KCNH1</p>                                                                                                                                                                                                                               |
| GO:0016540<br>Protein<br>autoprocessing                  | <p>TAO kinase 3<br/> U2AF homology motif (UHM) kinase 1<br/> lemur tyrosine kinase 2<br/> eukaryotic translation initiation factor 2-alpha kinase 3<br/> eukaryotic translation initiation factor 2-alpha kinase 1<br/> p21/Cdc42/Rac1-activated kinase 1 (STE20 homolog, yeast)</p>                                                                                                                                                                                                                                                                                                                                                                                                                                                                                                                                                                                                                                                                                                                                                                                                                                                                                                                                                                                                                                                                                                                                                                                                                                                                                                                                                                                                                                                                  | <p>TAOK3<br/> UHMK1<br/> LMTK2<br/> EIF2AK3<br/> EIF2AK1<br/> PAK1</p>                                                                                                                                                                                                                                                                                                                 |

|                                           |                                                                                                                                                                                                                                                                                                                                                                                                                                                                                                                                                                                                                                                                                                                                                                                                                                                                                                                                                                                                                                                                                                                                                                                                                                                                                                                                                                                                                                                                                                                                                                                                                                                                                                                                                                                                                                                                                                                                                                                                                                                                                                                                                                                                                                                                                                                                                                                                                                                                                                                                                                                                       |                                                                                                                                                                                                                                                                                                                                                                                                                                                                                                                                                                |
|-------------------------------------------|-------------------------------------------------------------------------------------------------------------------------------------------------------------------------------------------------------------------------------------------------------------------------------------------------------------------------------------------------------------------------------------------------------------------------------------------------------------------------------------------------------------------------------------------------------------------------------------------------------------------------------------------------------------------------------------------------------------------------------------------------------------------------------------------------------------------------------------------------------------------------------------------------------------------------------------------------------------------------------------------------------------------------------------------------------------------------------------------------------------------------------------------------------------------------------------------------------------------------------------------------------------------------------------------------------------------------------------------------------------------------------------------------------------------------------------------------------------------------------------------------------------------------------------------------------------------------------------------------------------------------------------------------------------------------------------------------------------------------------------------------------------------------------------------------------------------------------------------------------------------------------------------------------------------------------------------------------------------------------------------------------------------------------------------------------------------------------------------------------------------------------------------------------------------------------------------------------------------------------------------------------------------------------------------------------------------------------------------------------------------------------------------------------------------------------------------------------------------------------------------------------------------------------------------------------------------------------------------------------|----------------------------------------------------------------------------------------------------------------------------------------------------------------------------------------------------------------------------------------------------------------------------------------------------------------------------------------------------------------------------------------------------------------------------------------------------------------------------------------------------------------------------------------------------------------|
|                                           | <p>p21 (CDKN1A)-activated kinase 2<br/> insulin-like growth factor 1 receptor<br/> mitogen-activated protein kinase kinase kinase 3<br/> serine/threonine kinase 4<br/> NLR family, pyrin domain containing 12</p>                                                                                                                                                                                                                                                                                                                                                                                                                                                                                                                                                                                                                                                                                                                                                                                                                                                                                                                                                                                                                                                                                                                                                                                                                                                                                                                                                                                                                                                                                                                                                                                                                                                                                                                                                                                                                                                                                                                                                                                                                                                                                                                                                                                                                                                                                                                                                                                    | <p>PAK2<br/> IGF1R<br/> MAP3K3<br/> STK4<br/> NLRP12</p>                                                                                                                                                                                                                                                                                                                                                                                                                                                                                                       |
| <p>GO:0008233<br/> Peptidase activity</p> | <p>zinc metallopeptidase (STE24 homolog, yeast)<br/> cathepsin H<br/> thyrotropin-releasing hormone degrading enzyme<br/> matrix metallopeptidase 9 (gelatinase B, 92kDa gelatinase, 92kDa type IV collagenase)<br/> endoplasmic reticulum aminopeptidase 2<br/> ADAM metallopeptidase with thrombospondin type 1 motif, 2<br/> coagulation factor IX (plasma thromboplastic component, Christmas disease, hemophilia B)<br/> complement component 1, s subcomponent<br/> complement factor D (adipsin)<br/> ubiquitin specific peptidase 4 (proto-oncogene)<br/> ubiquitin specific peptidase 7 (herpes virus-associated)<br/> ubiquitin specific peptidase 14 (tRNA-guanine transglycosylase)<br/> ubiquitin specific peptidase 16<br/> ubiquitin carboxyl-terminal esterase L3 (ubiquitin thiolesterase)<br/> peptidase D<br/> carboxypeptidase A1 (pancreatic)<br/> gamma-glutamyl hydrolase (conjugase, folylpolyglutamyl hydrolase)<br/> ubiquitin specific peptidase 8<br/> mannan-binding lectin serine peptidase 1 (C4/C2 activating component of Ra-reactive factor)<br/> matrix metallopeptidase 2 (gelatinase A, 72kDa gelatinase, 72kDa type IV collagenase)<br/> protease, serine, 36<br/> presenilin 1 (Alzheimer disease 3)<br/> ATG4 autophagy related 4 homolog B (S. cerevisiae)<br/> ubiquitin specific peptidase 9, X-linked<br/> leucyl/cystinyl aminopeptidase<br/> angiotensin I converting enzyme (peptidyl-dipeptidase A) 2<br/> pappalysin 2<br/> methionyl aminopeptidase 2<br/> cathepsin K (pseudodeficiency)<br/> carboxypeptidase Q<br/> cathepsin S<br/> caspase 8, apoptosis-related cysteine peptidase<br/> ubiquitin specific peptidase 53<br/> RCE1 homolog, prenyl protein peptidase (S. cerevisiae)<br/> legumain<br/> carboxypeptidase D<br/> chymotrypsin-like elastase family, member 2B<br/> matrix metallopeptidase 3 (stromelysin 1, progelatinase)<br/> matrix metallopeptidase 14 (membrane-inserted)<br/> valosin containing protein (p97)/p47 complex interacting protein 1<br/> ubiquitin specific peptidase 12<br/> ubiquitin specific peptidase 6 (Tre-2 oncogene)<br/> ubiquitin specific peptidase 15<br/> matrix metallopeptidase 12 (macrophage elastase)<br/> alanyl (membrane) aminopeptidase (aminopeptidase N, aminopeptidase M, microsomal aminopeptidase, CD13, p150)<br/> caspase 3, apoptosis-related cysteine peptidase<br/> ubiquitin carboxyl-terminal esterase L1 (ubiquitin thiolesterase)<br/> protein disulfide isomerase family A, member 3<br/> lactotransferrin<br/> matrix metallopeptidase 8 (neutrophil collagenase)</p> | <p>ZMPSTE24<br/> CTSH<br/> TRHDE<br/> MMP9<br/> ERAP2<br/> ADAMTS2<br/> F9<br/> C1S<br/> CFD<br/> USP4<br/> USP7<br/> USP14<br/> USP16<br/> UCHL3<br/> PEPD<br/> CPA1<br/> GGH<br/> USP8<br/> MASP1<br/> MMP2<br/> PRSS36<br/> PSEN1<br/> ATG4B<br/> USP9X<br/> LNPEP<br/> ACE2<br/> PAPPA2<br/> METAP2<br/> CTSK<br/> PGCP<br/> CTSS<br/> CASP8<br/> USP53<br/> RCE1<br/> LGMN<br/> CPD<br/> CELA2B<br/> MMP3<br/> MMP14<br/> VCPIP1<br/> USP12<br/> ELANE<br/> USP6<br/> USP15<br/> MMP12<br/> ANPEP<br/> CASP3<br/> UCHL1<br/> PDIA3<br/> LTF<br/> MMP8</p> |
